# Supplementary material for: Antimicrobial and Cytotoxic Activities of the Secondary Metabolites of Endophytic Fungi Isolated from the Medicinal Plant Hyssopus officinalis
Source: MDPI journal article supplement (doi:10.3390/antibiotics12071201), 2023-07-18
Supplement: s1 [file s1]

## SUPPLEMENTARY MATERIAL

### Antimicrobial and Cytotoxic Activities of the Secondary Metabolites of Endophytic Fungi Isolated from the Medicinal Plant *Hyssopus officinalis*

Eshboev\_F2  
1H\_CD3OD\_15122022\_600MHz

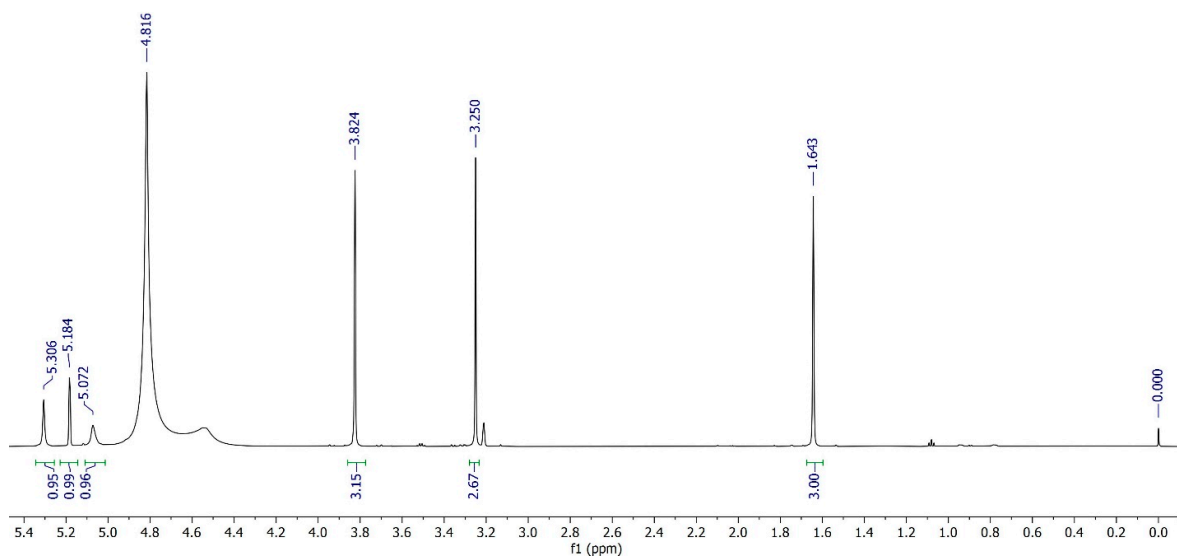

Figure S1. <sup>1</sup>H NMR (600 MHz) spectrum of compound **1** in CD<sub>3</sub>OD.

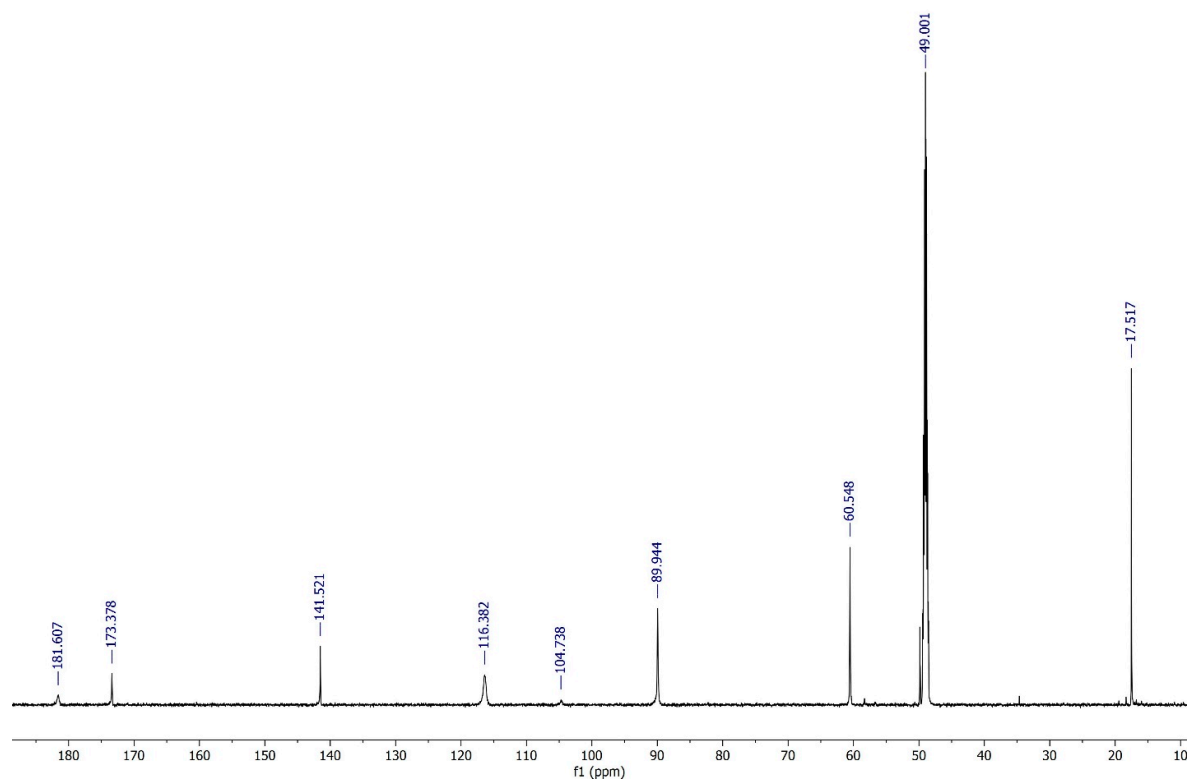

Figure S2.  $^{13}\text{C}$  NMR (150 MHz) spectrum of compound **1** in  $\text{CD}_3\text{OD}$ .

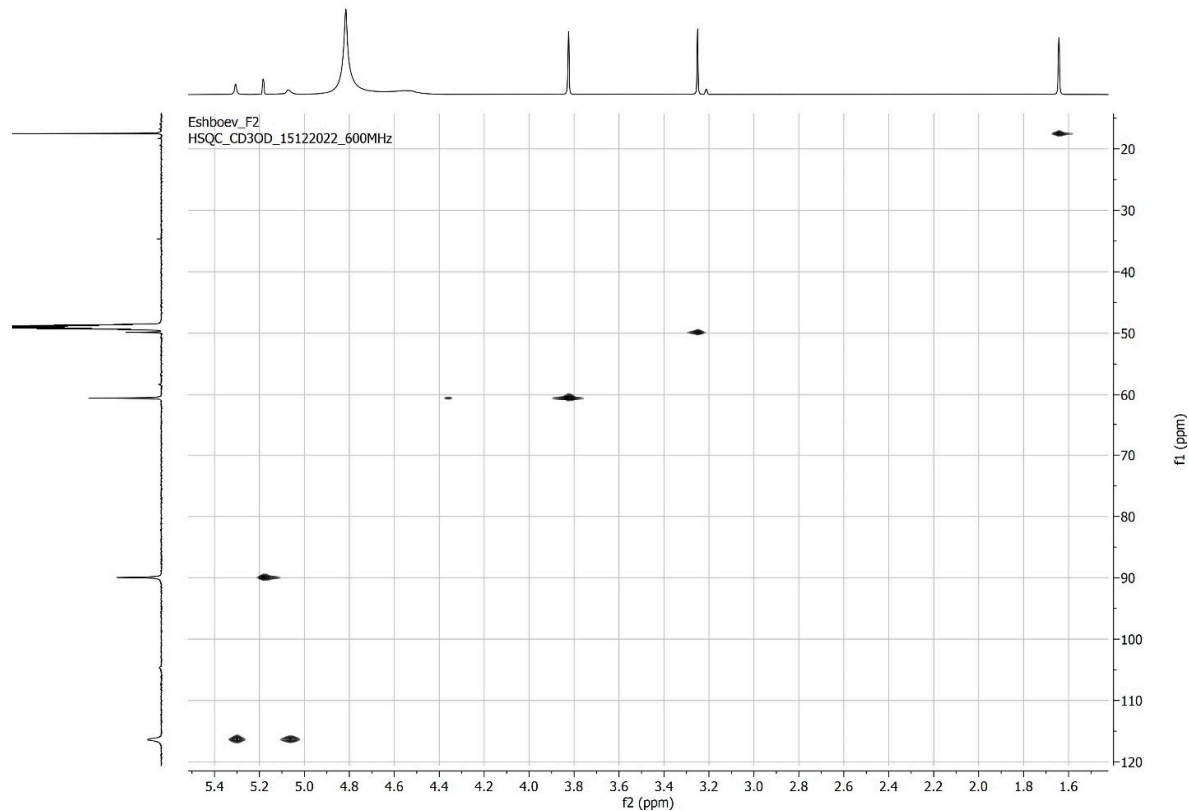

Figure S3. HSQC spectrum of compound **1** in  $\text{CD}_3\text{OD}$ .

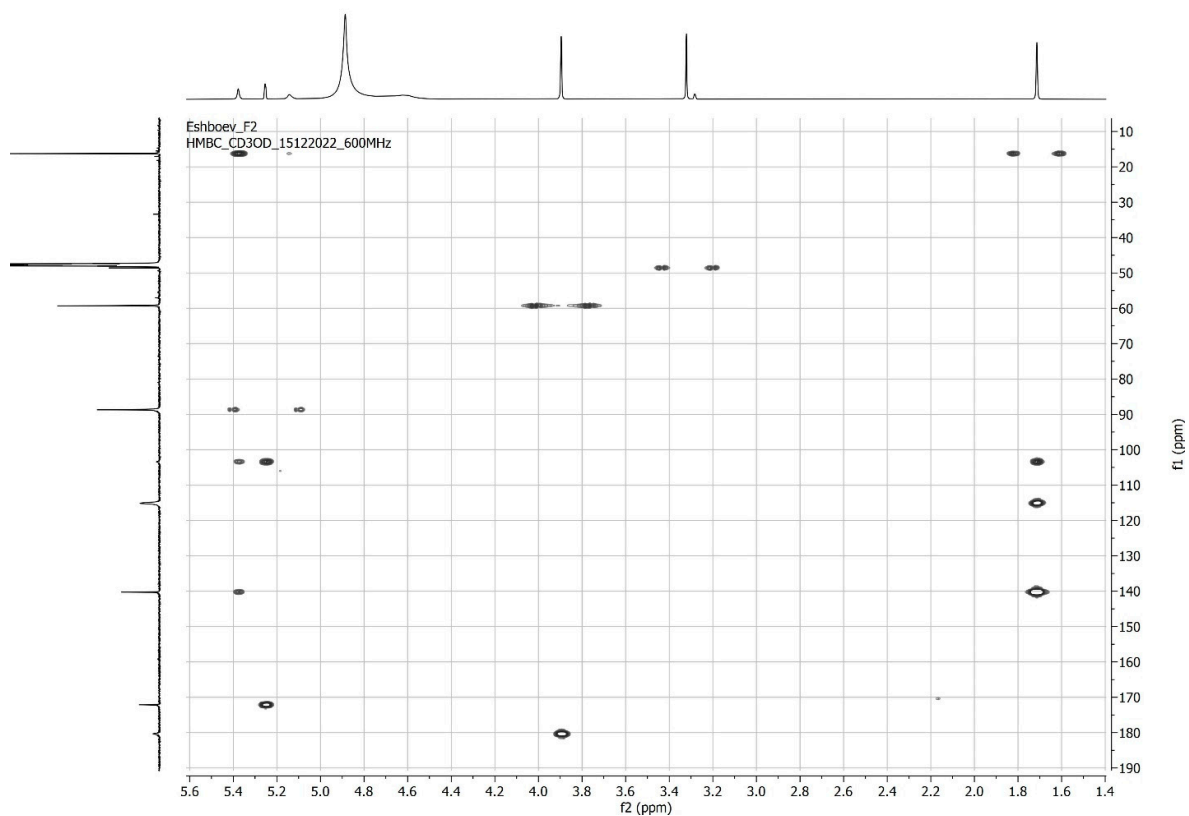

Figure S4. HMBC spectrum of compound 1 in CD<sub>3</sub>OD.

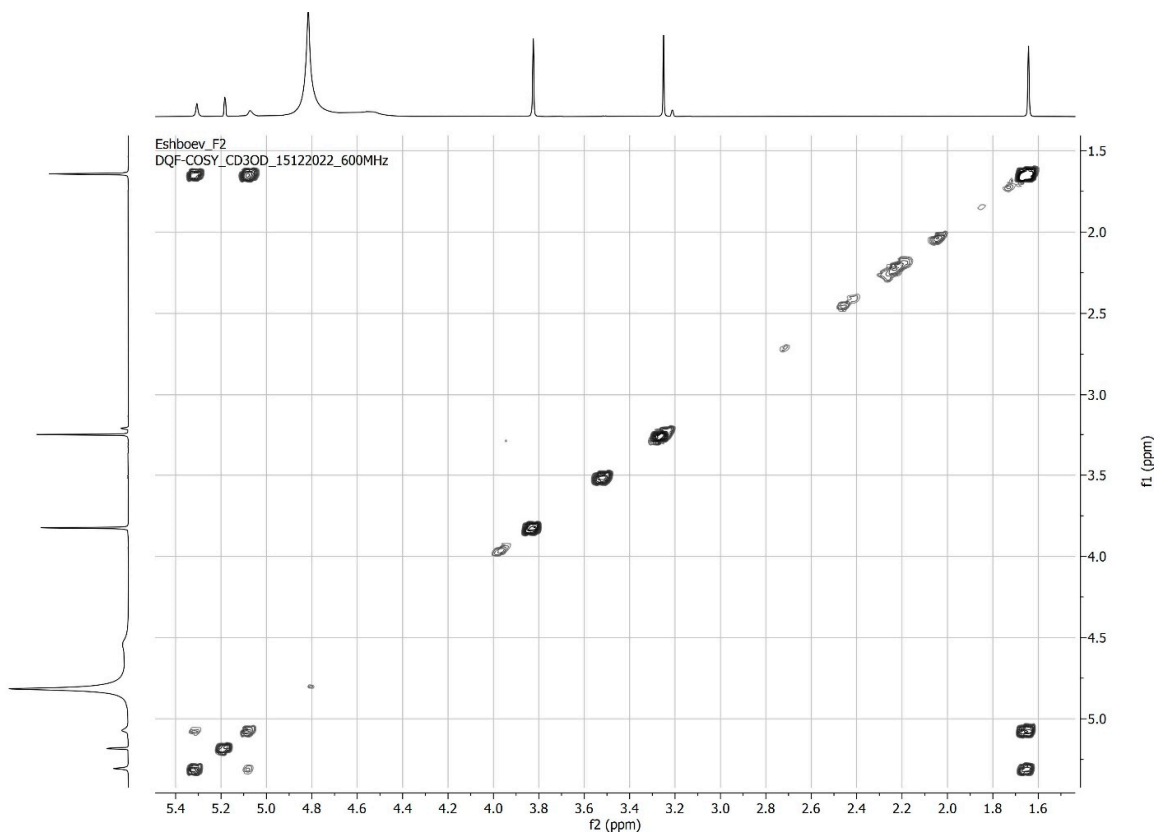

Figure S5. COSY spectrum of compound 1 in CD<sub>3</sub>OD.

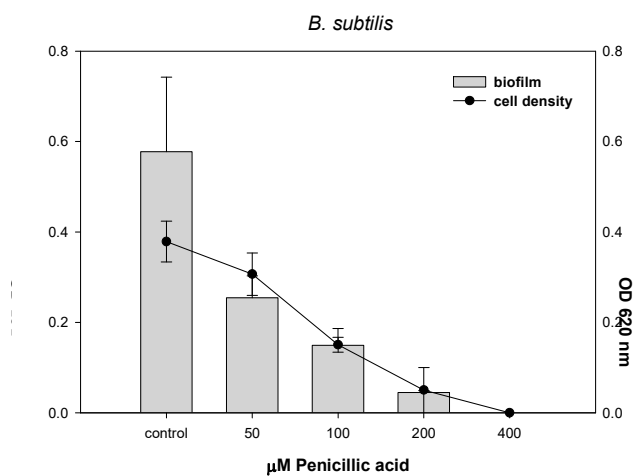

Figure S6. Biofilm formation of *B.subtilis* at different concentrations of penicillic acid.
